# Supplementary figures and images for: Decline in corepressor CNOT1 in the pregnant myometrium near term impairs progesterone receptor function and increases contractile gene expression
Source: PubMed Central journal article supplement — J Biol Chem. 2024 Jun 18;300(7):107484. doi: 10.1016/j.jbc.2024.107484 (PMC11301068; doi:10.1016/j.jbc.2024.107484), 2024-06-18

# Supplement Fig 1

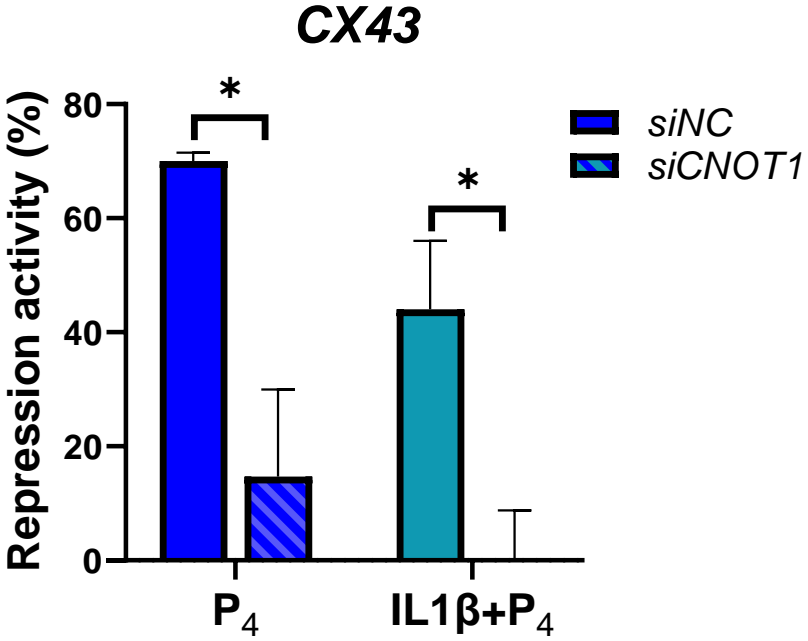

Supplement: mmc1.pdf [file mmc1.pdf]

# Supplemental Fig 2

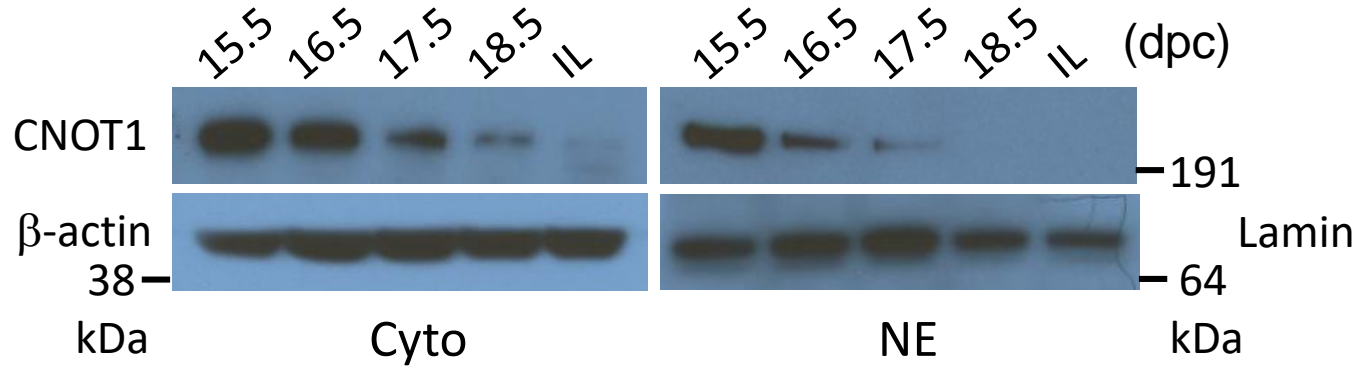

Supplement: mmc2.pdf [file mmc2.pdf]

# Supplement Figure 3

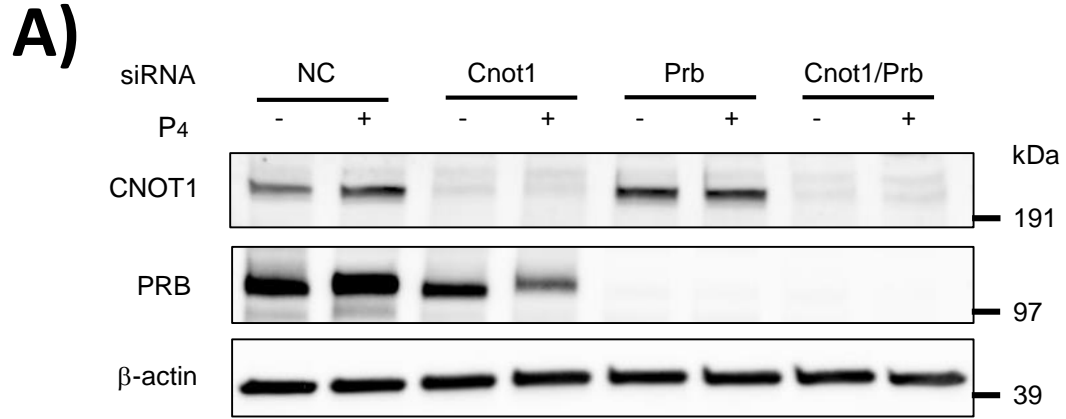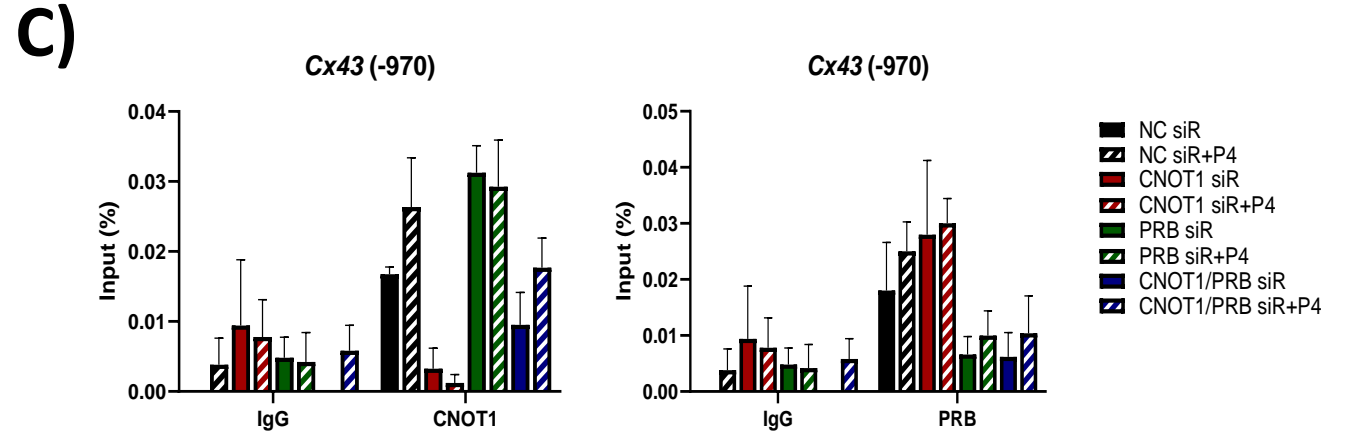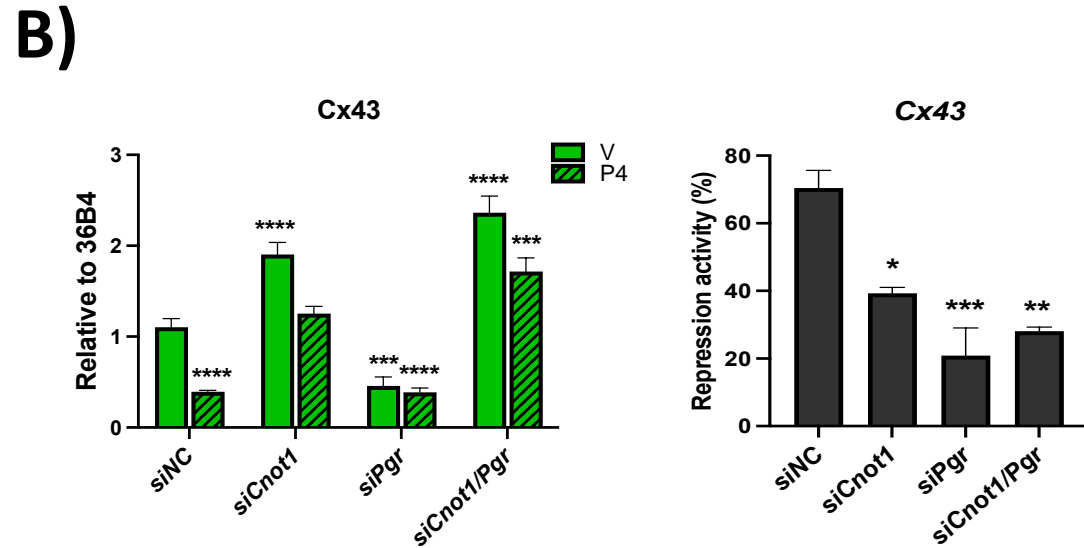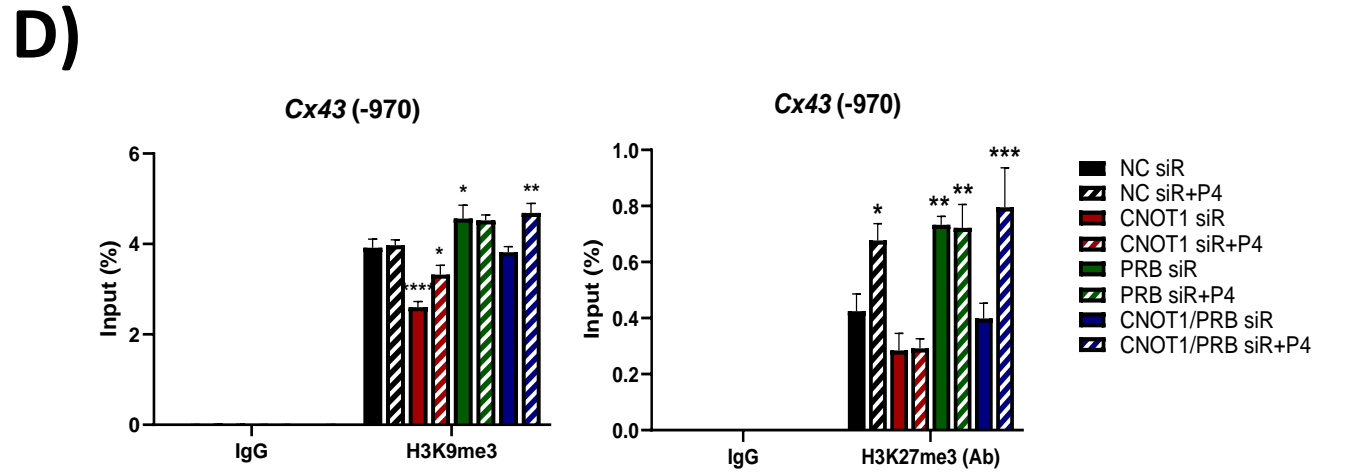

Supplement: mmc3.pdf [file mmc3.pdf]
